# Supplementary material
Source: PubMed Central journal article supplement (PMC6047743)

**Supplementary Figure 2 | Flow cytometry gating strategies.**

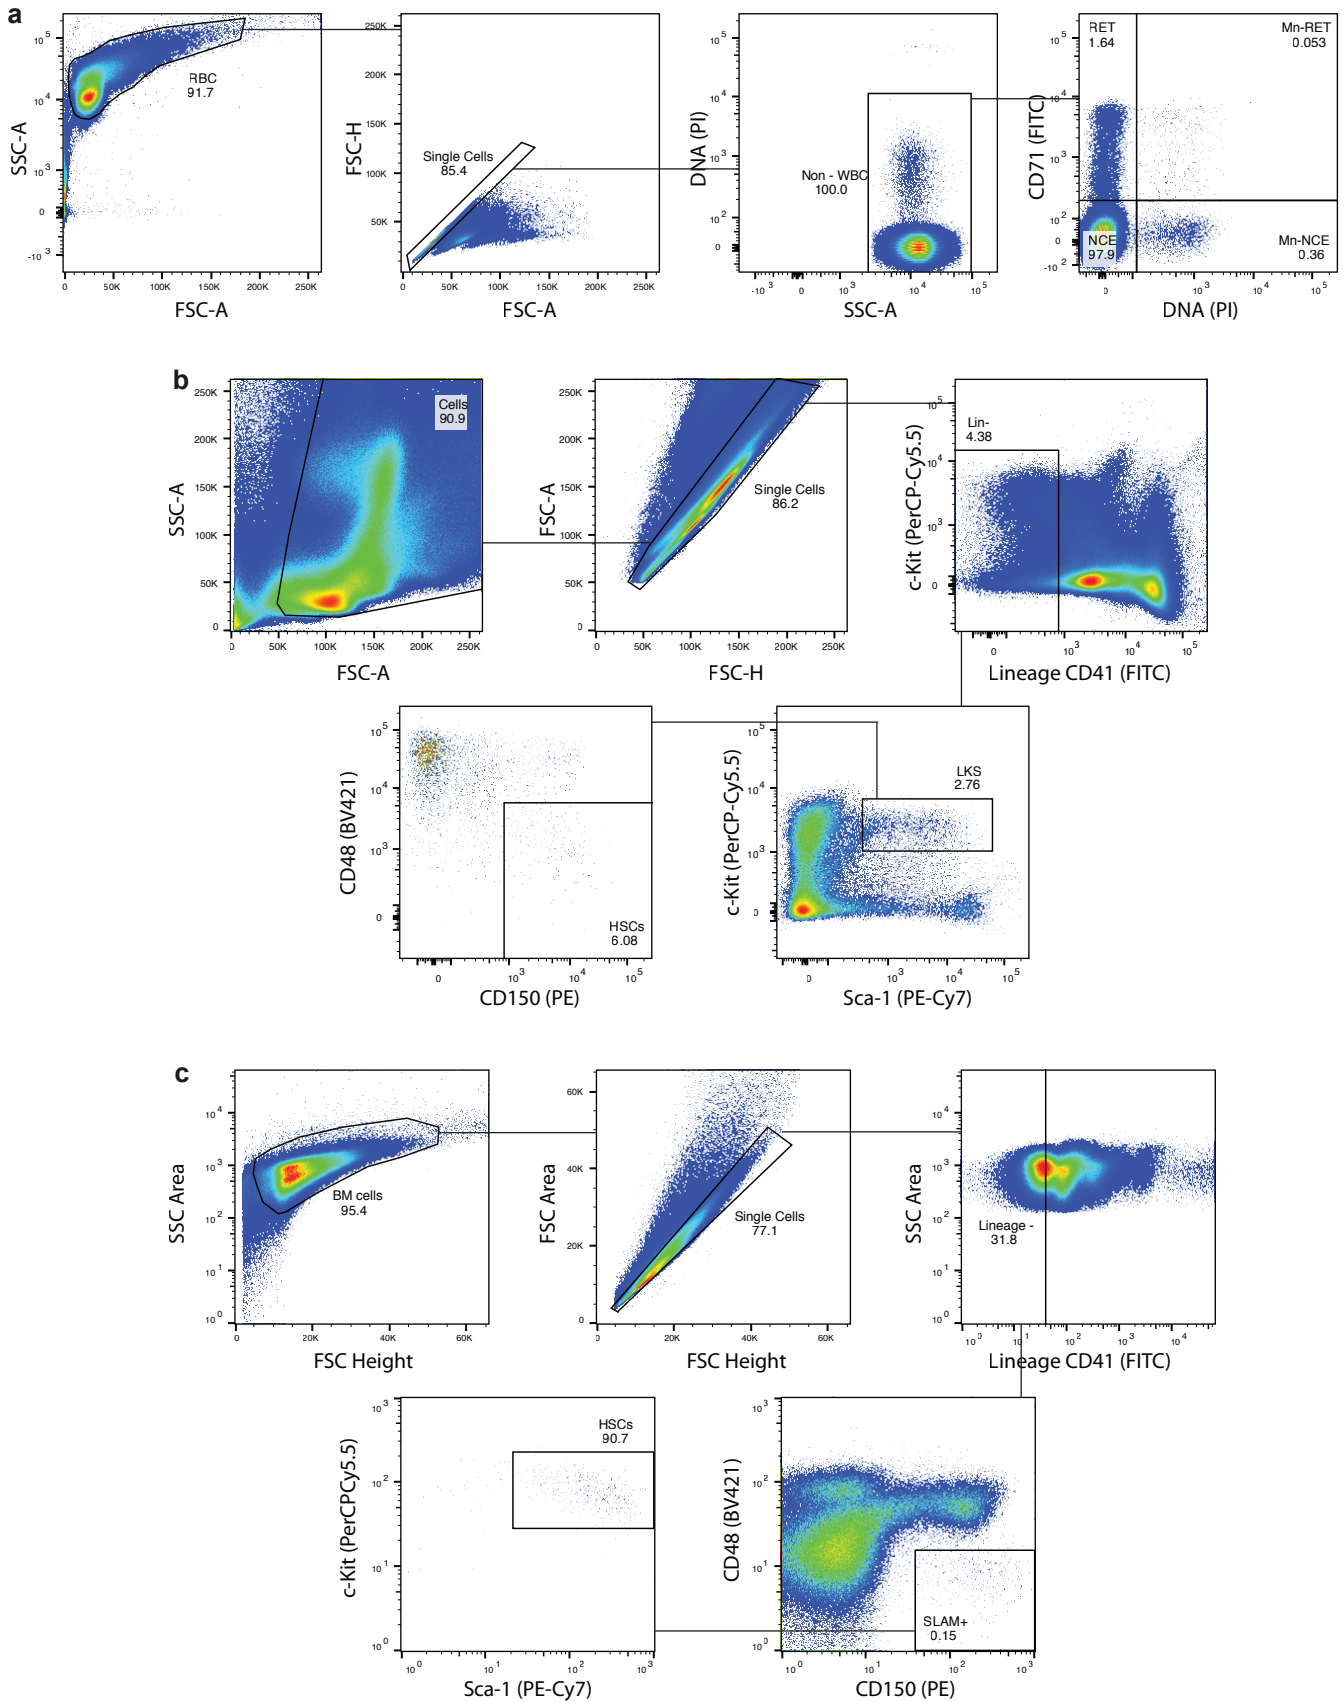

**Supplementary Figure 2 | Flow cytometry gating strategies. (continued)**

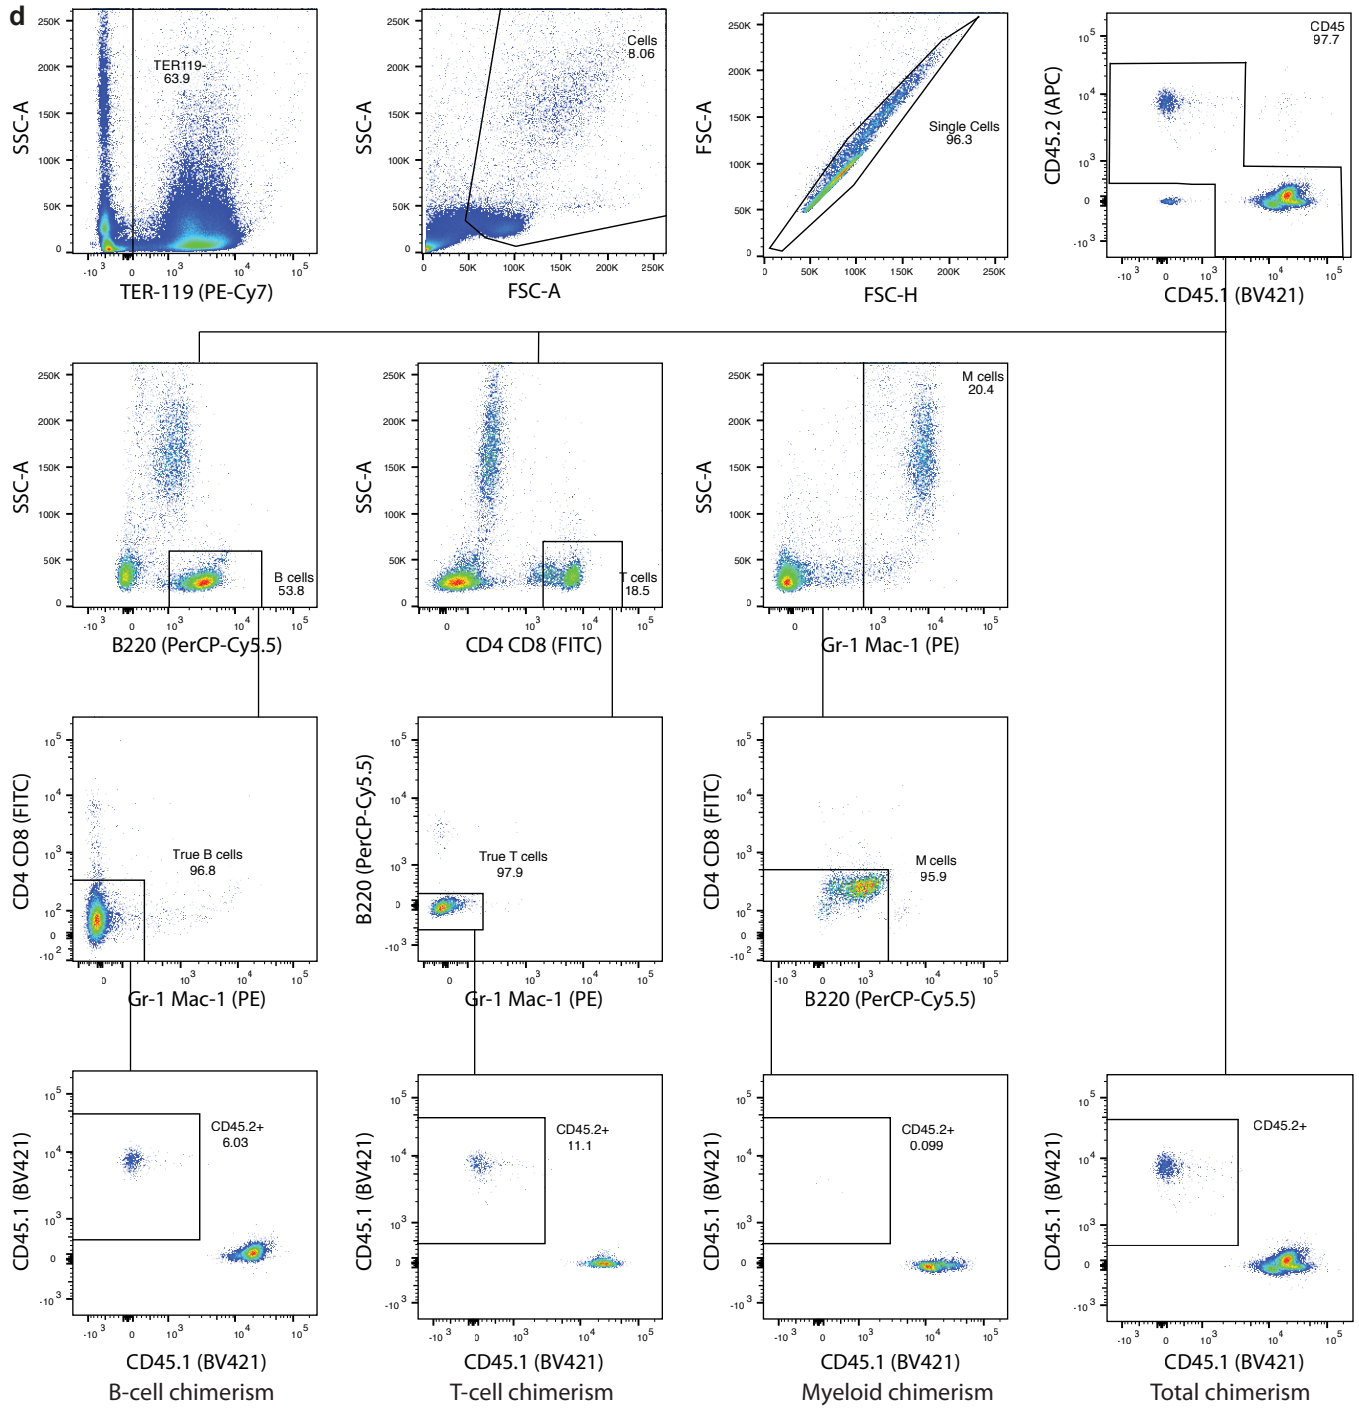

Supplement: NIHMS78399-supplement-Supplementary_Figure_2.pdf [file NIHMS78399-supplement-Supplementary_Figure_2.pdf]
