# Supplementary material
Source: PubMed Central journal article supplement (PMC6047743)
Supplement: NIHMS78399-supplement-Supplementary_Table_1.pdf [file NIHMS78399-supplement-Supplementary_Table_1.pdf]

Supplementary Table 1 | Generation of *Fanca*<sup>-/-</sup>*Ku70*<sup>-/-</sup> and *Fanca*<sup>F/-</sup>*Ku70*<sup>-/-</sup> *Vav1-iCre* mice

**a**

*Fanca* +/- × *Fanca* +/-

|                  | Mendelian ratios (%) | Observed ratios (%) | Observed number |
|------------------|----------------------|---------------------|-----------------|
| <i>Fanca</i> +/+ | 25                   | 31.6                | 195             |
| <i>Fanca</i> +/- | 50                   | 55.2                | 341             |
| <i>Fanca</i> -/- | 25                   | 13.3                | 82              |

P < 0.0001

618

**b**

*Ku70* +/- × *Ku70* +/-

|                 | Mendelian ratios (%) | Observed ratios (%) | Observed number |
|-----------------|----------------------|---------------------|-----------------|
| <i>Ku70</i> +/+ | 25                   | 34.4                | 65              |
| <i>Ku70</i> +/- | 50                   | 57.1                | 108             |
| <i>Ku70</i> -/- | 25                   | 8.5                 | 16              |

P < 0.0001

189

**c**

*Fanca* +/- × *Fanca* +/-  
*Ku70* +/- × *Ku70* +/-

|                                  | Mendelian ratios (%) | Expected ratios (%) * | Observed ratios (%) | Observed number |
|----------------------------------|----------------------|-----------------------|---------------------|-----------------|
| <i>Fanca</i> +/+ <i>Ku70</i> +/+ | 6.25                 | 10.85                 | 9.72                | 45              |
| <i>Fanca</i> +/+ <i>Ku70</i> +/- | 12.50                | 18.03                 | 17.71               | 82              |
| <i>Fanca</i> +/+ <i>Ku70</i> -/- | 6.25                 | 2.67                  | 2.59                | 12              |
| <i>Fanca</i> +/- <i>Ku70</i> +/+ | 12.50                | 18.98                 | 18.14               | 84              |
| <i>Fanca</i> +/- <i>Ku70</i> +/- | 25.00                | 31.53                 | 34.77               | 161             |
| <i>Fanca</i> +/- <i>Ku70</i> -/- | 12.50                | 4.67                  | 6.05                | 28              |
| <i>Fanca</i> -/- <i>Ku70</i> +/+ | 6.25                 | 4.56                  | 3.67                | 17              |
| <i>Fanca</i> -/- <i>Ku70</i> +/- | 12.50                | 7.58                  | 7.34                | 34              |
| <i>Fanca</i> -/- <i>Ku70</i> -/- | 6.25                 | 1.12                  | 0                   | 0               |

P = 0.0307

463

**d**

*Fanca* F/F × *Fanca* +/-  
*Ku70* +/- × *Ku70* +/-  
*Vav1-iCre*

|                                                   | Mendelian ratios (%) | Expected ratios (%) * | Observed ratios (%) | Observed number |
|---------------------------------------------------|----------------------|-----------------------|---------------------|-----------------|
| <i>Fanca</i> F/+ <i>Ku70</i> +/+                  | 6.25                 | 8.5                   | 12.5                | 46              |
| <i>Fanca</i> F/+ <i>Ku70</i> +/+ <i>Vav1-iCre</i> | 6.25                 | 8.5                   | 14.4                | 53              |
| <i>Fanca</i> F/+ <i>Ku70</i> +/-                  | 12.5                 | 14.3                  | 11.4                | 42              |
| <i>Fanca</i> F/+ <i>Ku70</i> +/- <i>Vav1-iCre</i> | 12.5                 | 14.3                  | 10.8                | 40              |
| <i>Fanca</i> F/+ <i>Ku70</i> -/-                  | 6.25                 | 2.1                   | 1.6                 | 6               |
| <i>Fanca</i> F/+ <i>Ku70</i> -/- <i>Vav1-iCre</i> | 6.25                 | 2.1                   | 1.9                 | 7               |
| <i>Fanca</i> F/- <i>Ku70</i> +/+                  | 6.25                 | 8.5                   | 13.6                | 50              |
| <i>Fanca</i> F/- <i>Ku70</i> +/+ <i>Vav1-iCre</i> | 6.25                 | 8.5                   | 9.5                 | 35              |
| <i>Fanca</i> F/- <i>Ku70</i> +/-                  | 12.5                 | 14.3                  | 12.2                | 45              |
| <i>Fanca</i> F/- <i>Ku70</i> +/- <i>Vav1-iCre</i> | 12.5                 | 14.3                  | 7.9                 | 29              |
| <i>Fanca</i> F/- <i>Ku70</i> -/-                  | 6.25                 | 2.1                   | 2.7                 | 10              |
| <i>Fanca</i> F/- <i>Ku70</i> -/- <i>Vav1-iCre</i> | 6.25                 | 2.1                   | 1.6                 | 6               |

P = 0.6035

369
