# Supplementary material
Source: PubMed Central journal article supplement (PMC6047743)
Supplement: NIHMS78399-supplement-Supplementary_Table_2.pdf [file NIHMS78399-supplement-Supplementary_Table_2.pdf]

**Supplementary Table 2 | p53 deficiency does not suppress the embryonic lethality of *Aldh2*<sup>-/-</sup>*Fancd2*<sup>-/-</sup> mice in *Aldh2*<sup>-/-</sup> mothers**

**a** *Aldh2* +/- *Fancd2* +/- (C57BL/6 males) ×  
*Aldh2* +/- *Fancd2* +/- (129/Sv females)

|                                    | Mendelian ratios (%) | Observed ratios (%) | Observed number |
|------------------------------------|----------------------|---------------------|-----------------|
| <i>Aldh2</i> +/+ <i>Fancd2</i> +/+ | 6.25                 | 7.30                | 87              |
| <i>Aldh2</i> +/+ <i>Fancd2</i> +/- | 12.5                 | 12.34               | 147             |
| <i>Aldh2</i> +/+ <i>Fancd2</i> -/- | 6.25                 | 6.38                | 76              |
| <i>Aldh2</i> +/- <i>Fancd2</i> +/+ | 12.5                 | 14.11               | 168             |
| <i>Aldh2</i> +/- <i>Fancd2</i> +/- | 25.0                 | 25.61               | 305             |
| <i>Aldh2</i> +/- <i>Fancd2</i> -/- | 12.5                 | 12.34               | 147             |
| <i>Aldh2</i> -/- <i>Fancd2</i> +/+ | 6.25                 | 6.05                | 72              |
| <i>Aldh2</i> -/- <i>Fancd2</i> +/- | 12.5                 | 11.08               | 132             |
| <i>Aldh2</i> -/- <i>Fancd2</i> -/- | 6.25                 | 4.79                | 57              |

P = 0.1504

1191

**b** *Aldh2* -/- *Fancd2* +/- (C57BL/6 males) ×  
*Aldh2* +/- *Fancd2* +/- (129/Sv females)

|                                    | Mendelian ratios (%) | Observed ratios (%) | Observed number |
|------------------------------------|----------------------|---------------------|-----------------|
| <i>Aldh2</i> +/- <i>Fancd2</i> +/+ | 12.5                 | 14.01               | 51              |
| <i>Aldh2</i> +/- <i>Fancd2</i> +/- | 25.0                 | 23.90               | 87              |
| <i>Aldh2</i> +/- <i>Fancd2</i> -/- | 12.5                 | 10.16               | 37              |
| <i>Aldh2</i> -/- <i>Fancd2</i> +/+ | 12.5                 | 12.09               | 44              |
| <i>Aldh2</i> -/- <i>Fancd2</i> +/- | 25.0                 | 28.30               | 103             |
| <i>Aldh2</i> -/- <i>Fancd2</i> -/- | 12.5                 | 11.54               | 42              |

P = 0.8194

364

**d** *Aldh2* -/- *Fancd2* +/- *p53* -/- (C57BL/6 males) ×  
*Aldh2* +/- *Fancd2* +/- *p53* +/- (129/Sv females)

|                                                   | Mendelian ratios (%) | Observed ratios (%) | Observed number |
|---------------------------------------------------|----------------------|---------------------|-----------------|
| <i>Aldh2</i> +/- <i>Fancd2</i> +/+ <i>p53</i> +/- | 6.25                 | 4.76                | 6               |
| <i>Aldh2</i> +/- <i>Fancd2</i> +/+ <i>p53</i> -/- | 6.25                 | 7.14                | 9               |
| <i>Aldh2</i> +/- <i>Fancd2</i> +/- <i>p53</i> +/- | 12.5                 | 15.87               | 20              |
| <i>Aldh2</i> +/- <i>Fancd2</i> +/- <i>p53</i> -/- | 12.5                 | 7.94                | 10              |
| <i>Aldh2</i> +/- <i>Fancd2</i> -/- <i>p53</i> +/- | 6.25                 | 9.52                | 12              |
| <i>Aldh2</i> +/- <i>Fancd2</i> -/- <i>p53</i> -/- | 6.25                 | 3.17                | 4               |
| <i>Aldh2</i> -/- <i>Fancd2</i> +/+ <i>p53</i> +/- | 6.25                 | 8.73                | 11              |
| <i>Aldh2</i> -/- <i>Fancd2</i> +/+ <i>p53</i> -/- | 6.25                 | 7.14                | 9               |
| <i>Aldh2</i> -/- <i>Fancd2</i> +/- <i>p53</i> +/- | 12.5                 | 13.49               | 17              |
| <i>Aldh2</i> -/- <i>Fancd2</i> +/- <i>p53</i> -/- | 12.5                 | 11.11               | 14              |
| <i>Aldh2</i> -/- <i>Fancd2</i> -/- <i>p53</i> +/- | 6.25                 | 3.97                | 5               |
| <i>Aldh2</i> -/- <i>Fancd2</i> -/- <i>p53</i> -/- | 6.25                 | 7.14                | 9               |

P = 1.0

126

**c** *Aldh2* -/- *Fancd2* +/- (C57BL/6 males) ×  
*Aldh2* -/- *Fancd2* +/- (129/Sv females)

|                                    | Mendelian ratios (%) | Observed ratios (%) | Observed number |
|------------------------------------|----------------------|---------------------|-----------------|
| <i>Aldh2</i> -/- <i>Fancd2</i> +/+ | 25                   | 37.29               | 22              |
| <i>Aldh2</i> -/- <i>Fancd2</i> +/- | 50                   | 62.71               | 37              |
| <i>Aldh2</i> -/- <i>Fancd2</i> -/- | 25                   | 0                   | 0               |

P < 0.0001

59

**e** *Aldh2* -/- *Fancd2* +/- *p53* -/- (C57BL/6 males) ×  
*Aldh2* -/- *Fancd2* +/- *p53* +/- (129/Sv females)

|                                                   | Mendelian ratios (%) | Observed ratios (%) | Observed number |
|---------------------------------------------------|----------------------|---------------------|-----------------|
| <i>Aldh2</i> -/- <i>Fancd2</i> +/+ <i>p53</i> +/- | 12.5                 | 15.2                | 7               |
| <i>Aldh2</i> -/- <i>Fancd2</i> +/+ <i>p53</i> -/- | 12.5                 | 17.4                | 8               |
| <i>Aldh2</i> -/- <i>Fancd2</i> +/- <i>p53</i> +/- | 25.0                 | 30.4                | 14              |
| <i>Aldh2</i> -/- <i>Fancd2</i> +/- <i>p53</i> -/- | 25.0                 | 37.0                | 17              |
| <i>Aldh2</i> -/- <i>Fancd2</i> -/- <i>p53</i> +/- | 12.5                 | 0                   | 0               |
| <i>Aldh2</i> -/- <i>Fancd2</i> -/- <i>p53</i> -/- | 12.5                 | 0                   | 0               |

P = 0.0263

46
